# Supplementary material for: Phenolic Compounds from the Flowers of Bombax malabaricum and Their Antioxidant and Antiviral Activities
Source: Molecules. 2015 Nov 5;20(11):19947–57. doi: 10.3390/molecules201119660 (PMC6331941; doi:10.3390/molecules201119660)
Supplement: Supplementary file 1 [file molecules-20-19660-s001.pdf]

## Supplementary Informations

**Table S1.** NMR data of **14** (bombalin) (in CD<sub>3</sub>OD, *J* in Hz).

| Position           | <b>14</b>                |            |
|--------------------|--------------------------|------------|
|                    | $\delta_H$               | $\delta_C$ |
| 1                  | -                        | 177.5      |
| 2                  | 4.65 (1H, d, 4.5)        | 73.0       |
| 3                  | 4.11 (1H, dd, 4.5, 3.6,) | 80.2       |
| 4                  | 4.47 (1H, dd, 8.0, 3.6,) | 81.6       |
| 5                  | 4.19 (1H, dd, 8.0, 4.4,) | 69.6       |
| 6                  | 4.31 (2H, m)             | 65.8       |
| 1'                 | -                        | 127.3      |
| 2'                 | 7.47 (1H, d, 8.5)        | 131.4      |
| 3'                 | 6.81 (1H, d, 8.5)        | 117.0      |
| 4'                 | -                        | 161.5      |
| 5'                 | 6.81 (1H, d, 8.5)        | 117.0      |
| 6'                 | 7.47 (1H, d, 8.5)        | 131.4      |
| 7'                 | 7.68 (1H, d, 15.9)       | 147.2      |
| 8'                 | 6.38 (1H, d, 15.9)       | 114.9      |
| 9'                 | -                        | 169.1      |
| 3-OCH <sub>3</sub> | 3.58 (3H, s)             | 61.0       |

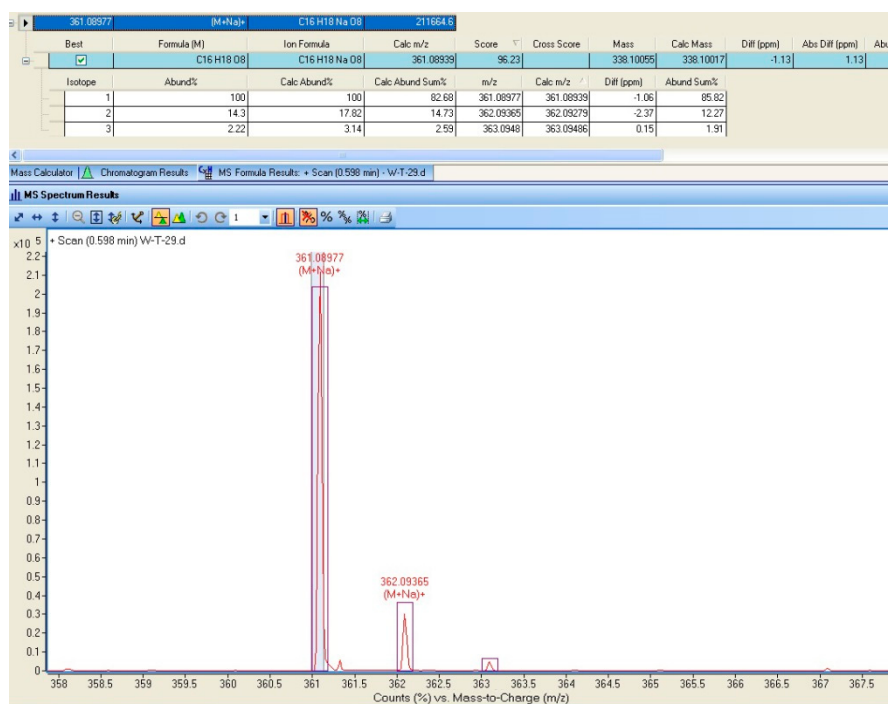

**Figure S1.** HR-ESI-MS spectrum of **1** (4-*epi*-bombalin).

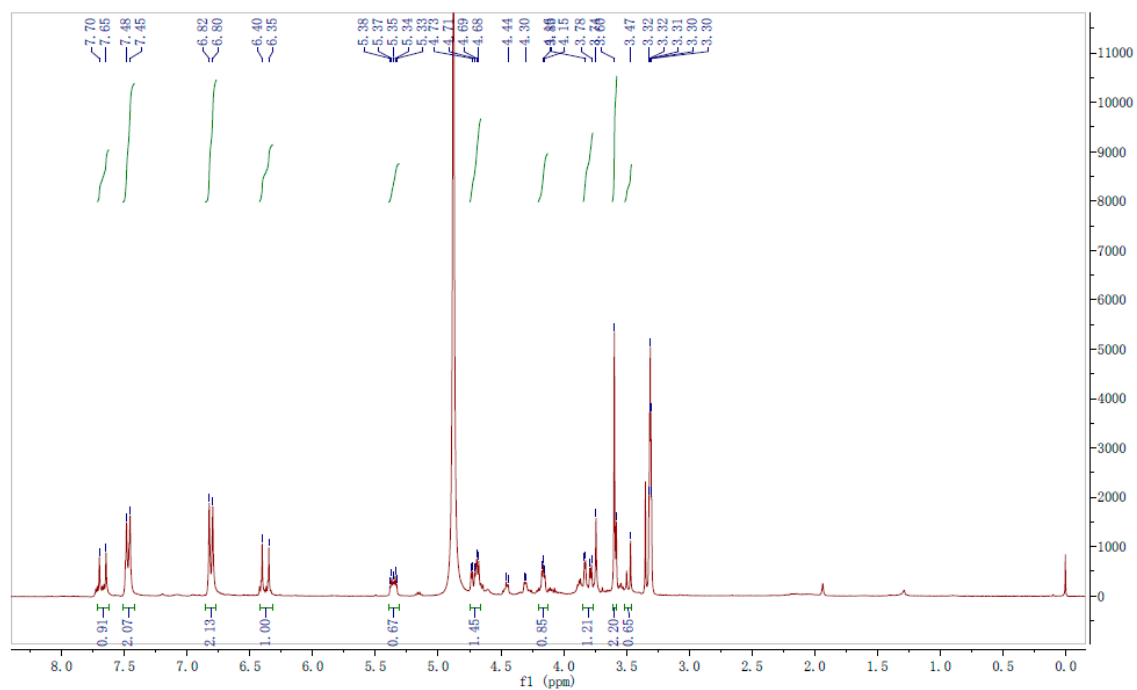

Figure S2. <sup>1</sup>H-NMR spectrum of 1 in CD<sub>3</sub>OD.

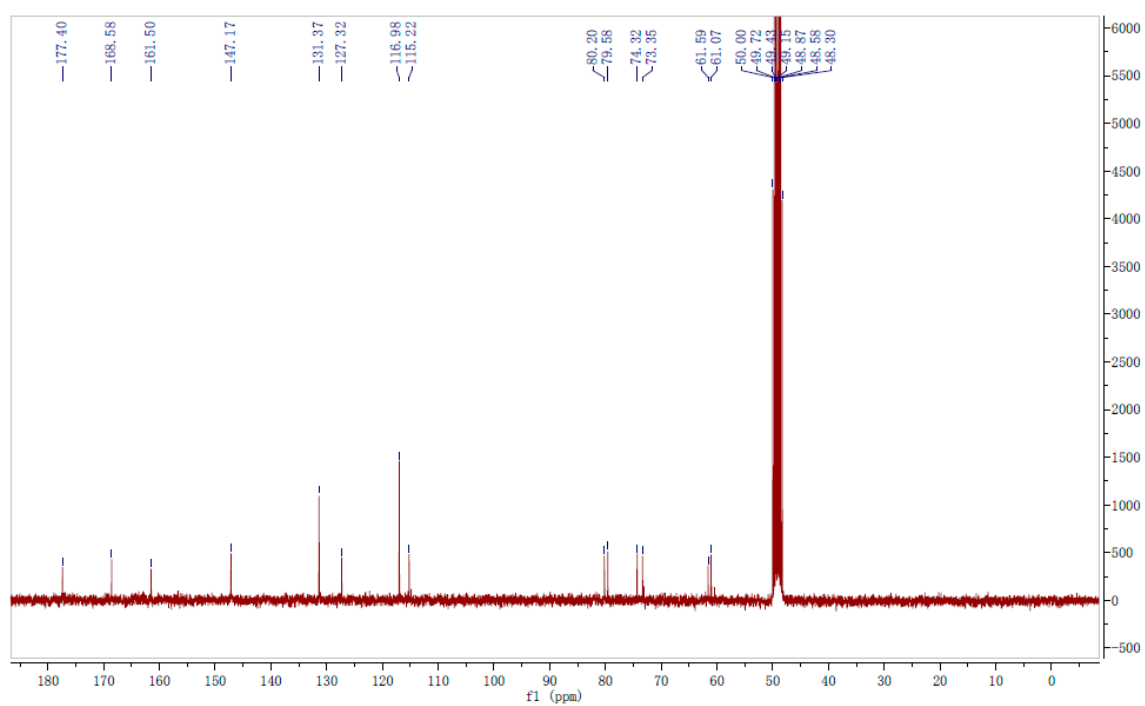

Figure S3. <sup>13</sup>C-NMR spectrum of 1 in CD<sub>3</sub>OD.

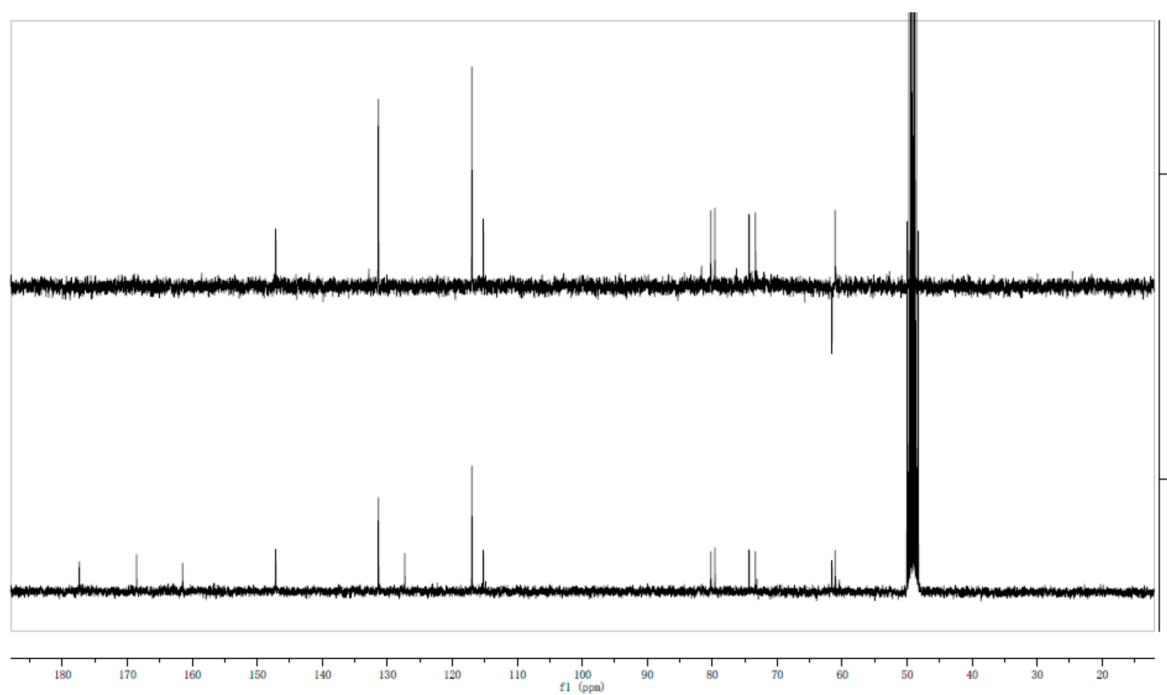

Figure S4. DEPT spectrum of **1** in CD<sub>3</sub>OD.

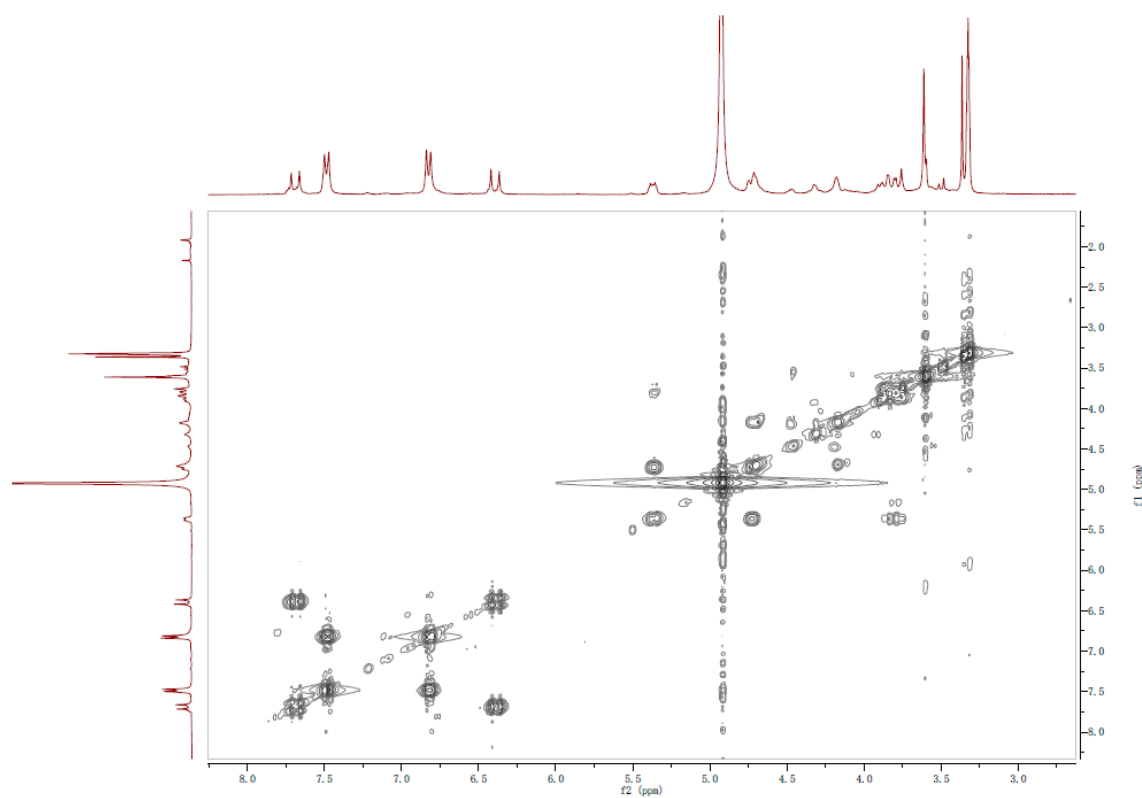

Figure S5. <sup>1</sup>H-<sup>1</sup>H COSY spectrum of **1** in CD<sub>3</sub>OD.

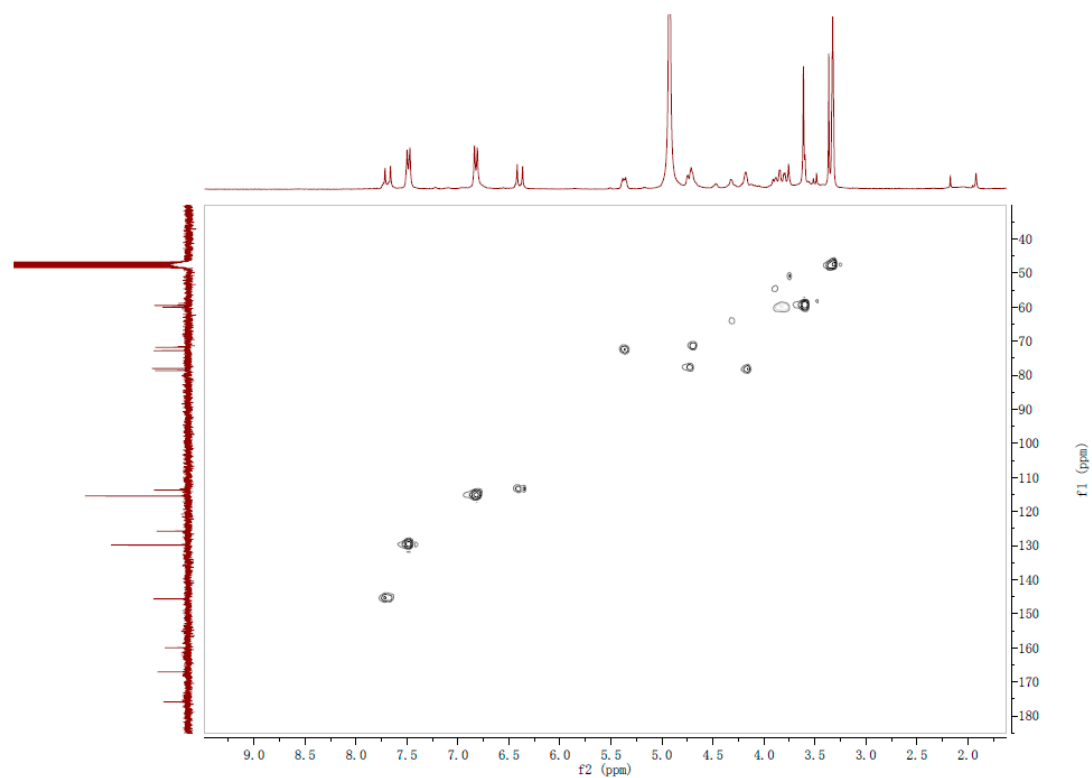

Figure S6. HSQC spectrum of **1** in CD<sub>3</sub>OD.

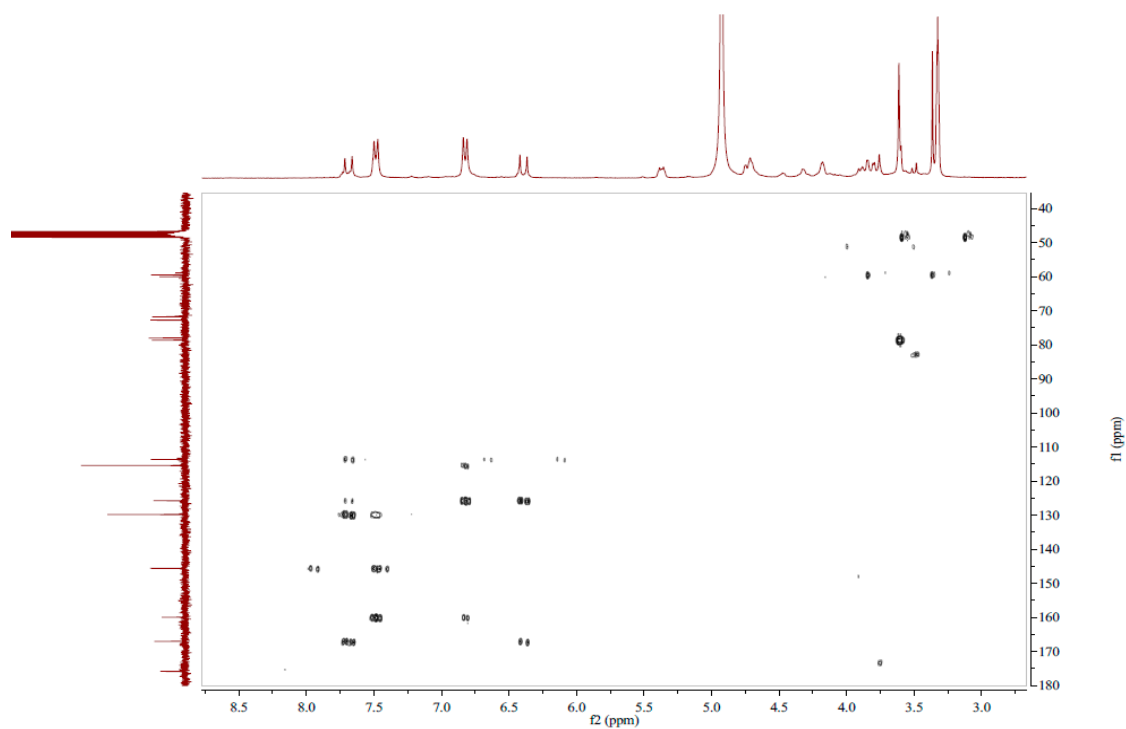

Figure S7. HMBC spectrum of **1** in CD<sub>3</sub>OD.

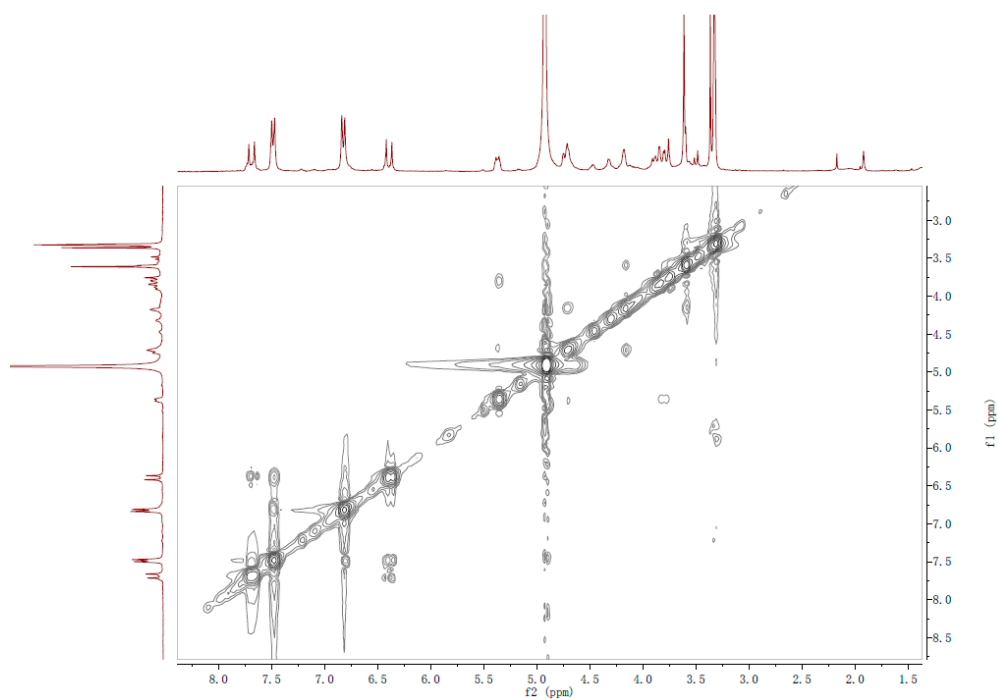

Figure S8. ROESY spectrum of 1 in CD<sub>3</sub>OD.

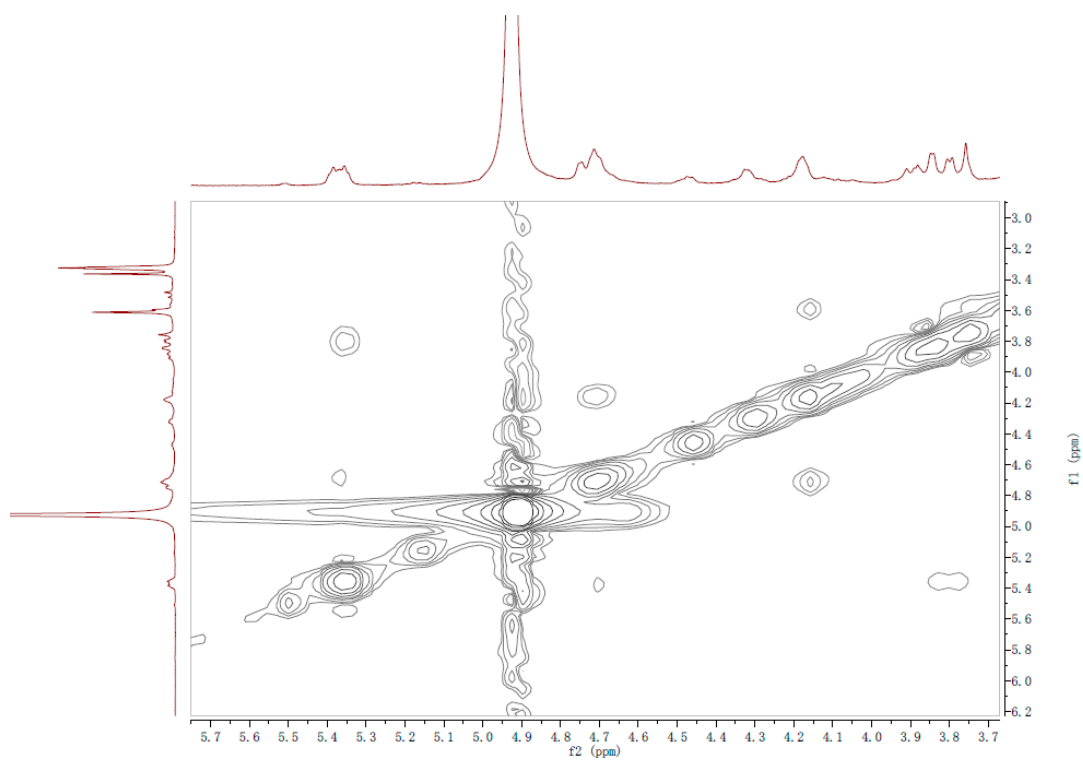

Figure S9. Enlarged ROESY spectrum of 1.

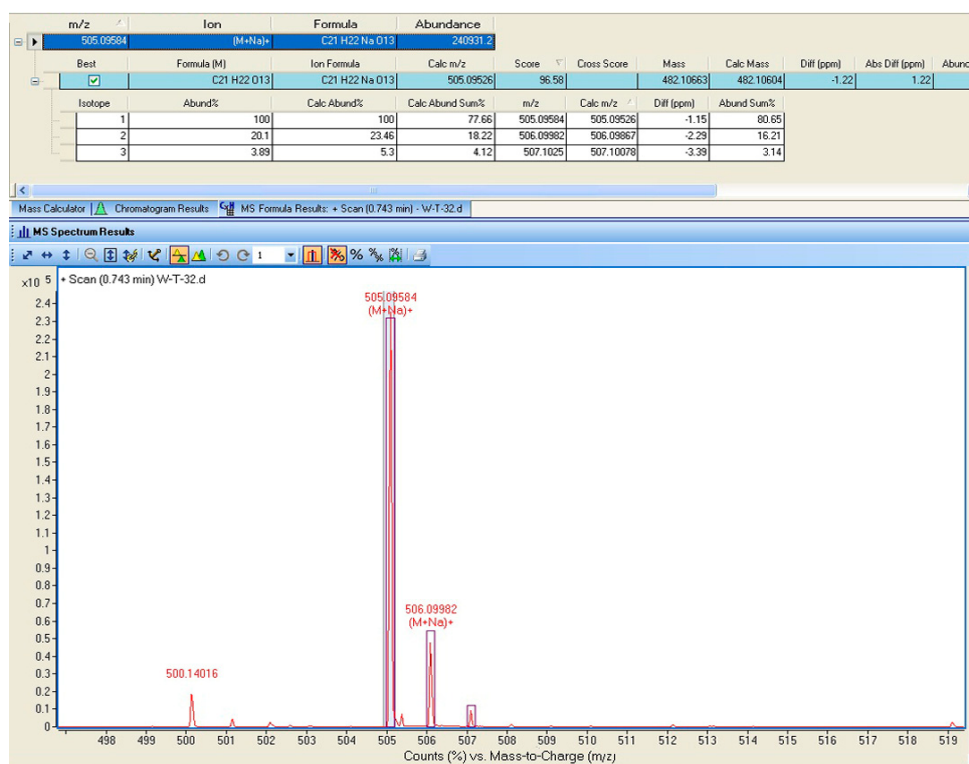

**Figure S10.** HR-ESI-MS spectrum of **2** (2-*O*-(3,4-dihydroxybenzoyl)-2,4,6-trihydroxyphenylacetic acid 4-*O*-β-D-glucopyranoside).

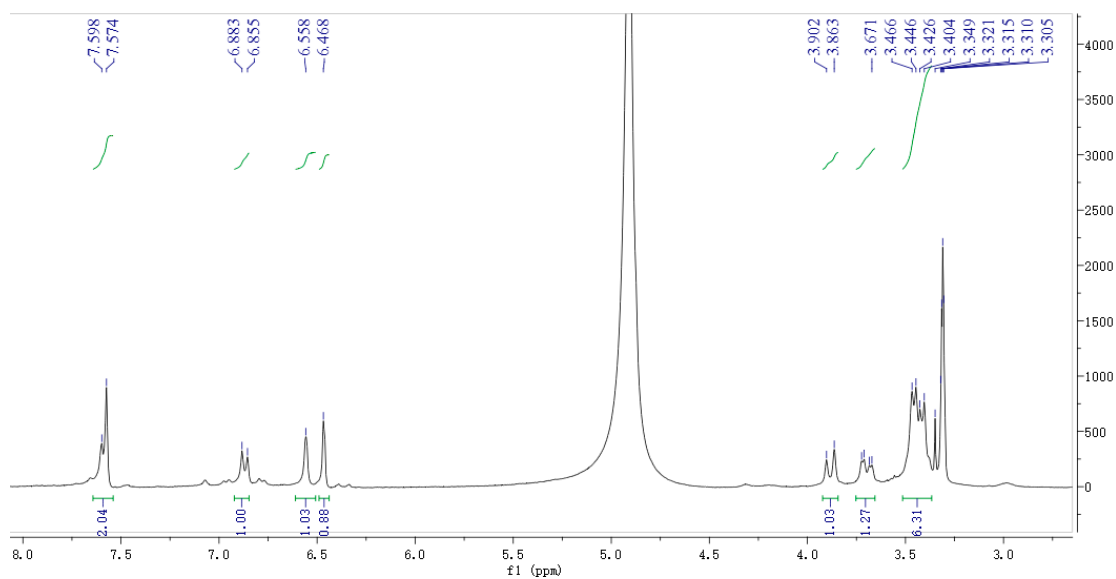

**Figure S11.** <sup>1</sup>H-NMR spectrum of **2** in CD<sub>3</sub>OD.

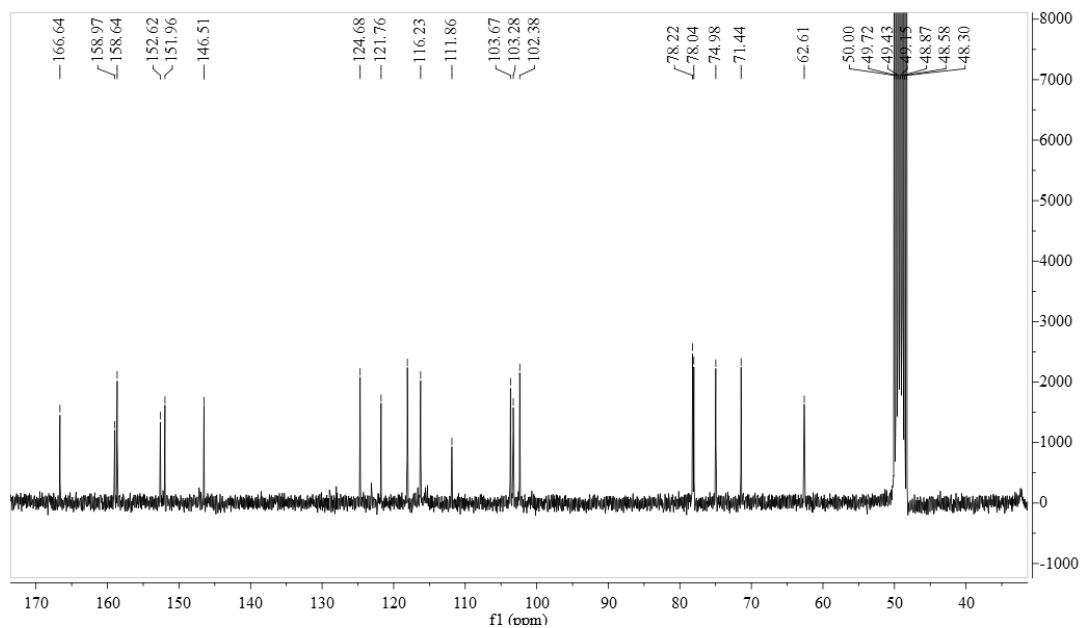

Figure S12.  $^{13}\text{C}$ -NMR spectrum of **2** in  $\text{CD}_3\text{OD}$ .

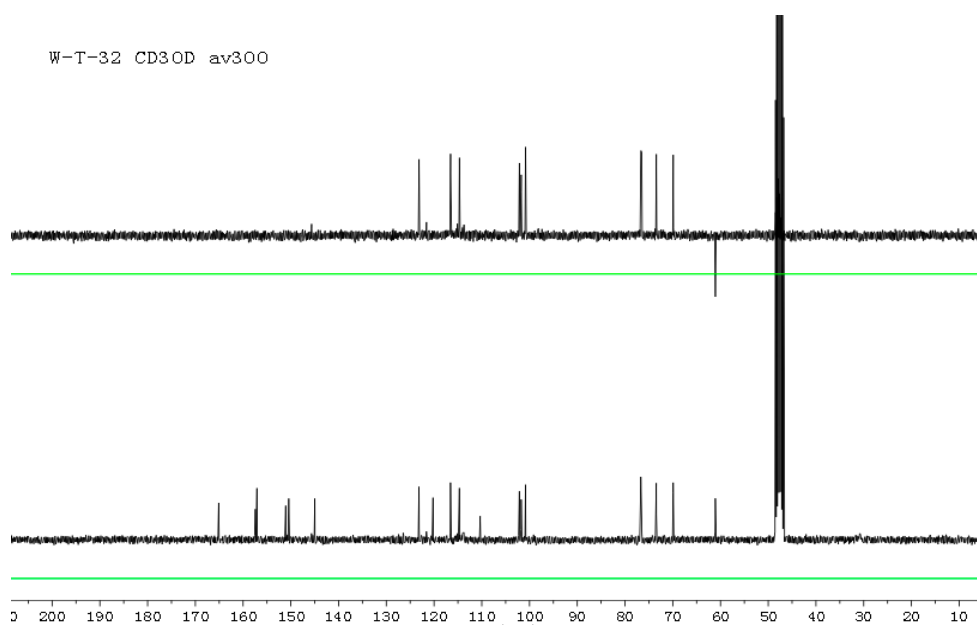

Figure S13. DEPT spectrum of **2** in  $\text{CD}_3\text{OD}$ .

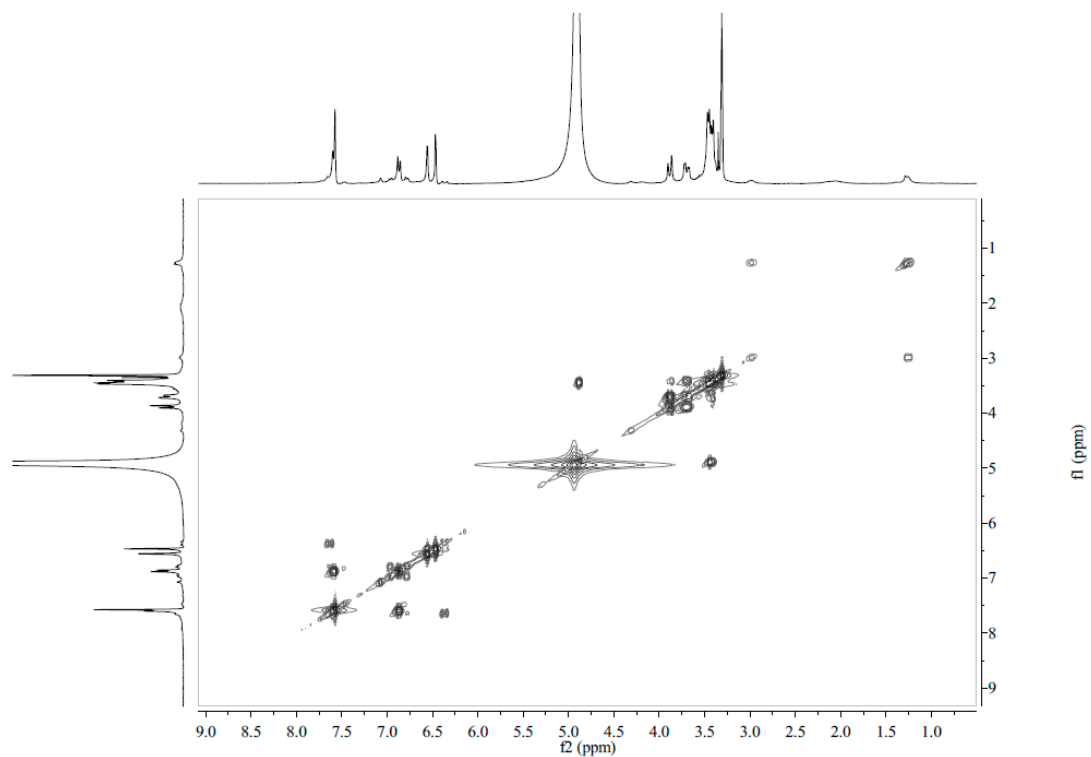

Figure S14.  $^1\text{H}$ - $^1\text{H}$  COSY spectrum of **2** in  $\text{CD}_3\text{OD}$ .

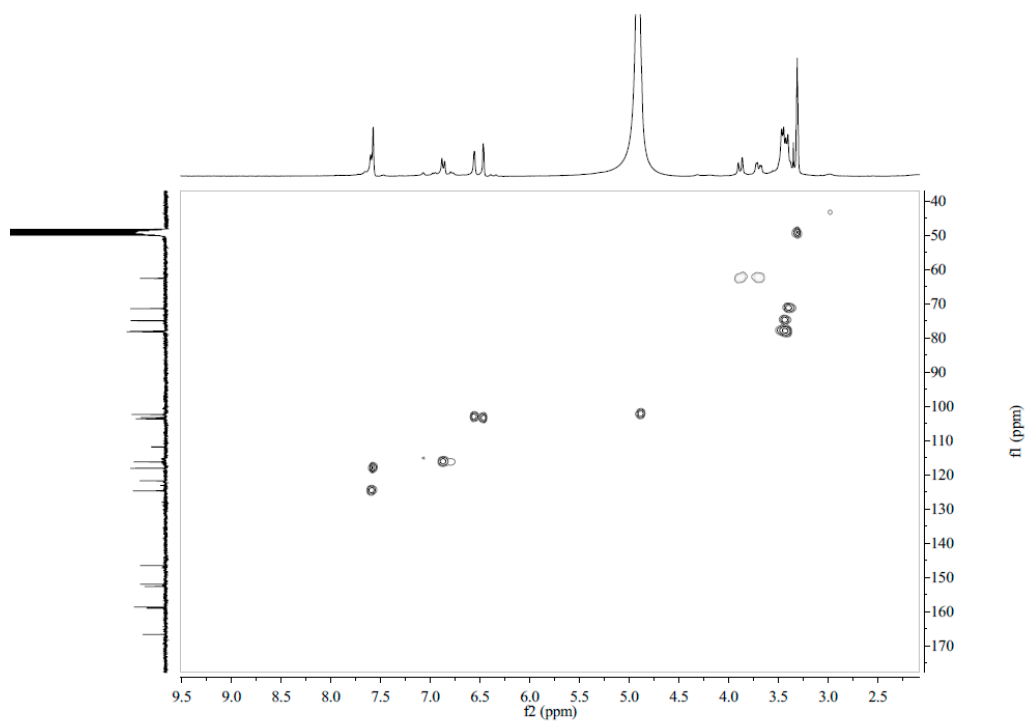

Figure S15. HSQC spectrum of **2** in  $\text{CD}_3\text{OD}$ .

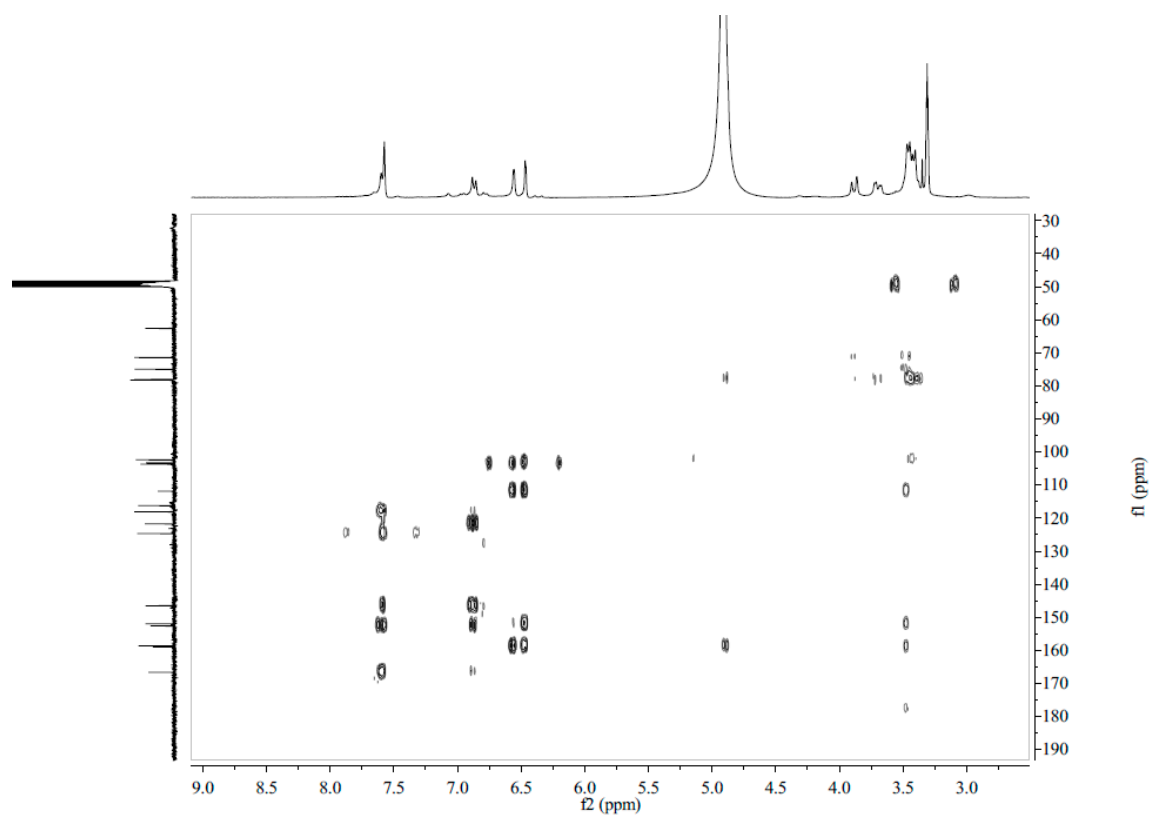

Figure S16. HMBC spectrum of **2** in CD<sub>3</sub>OD.

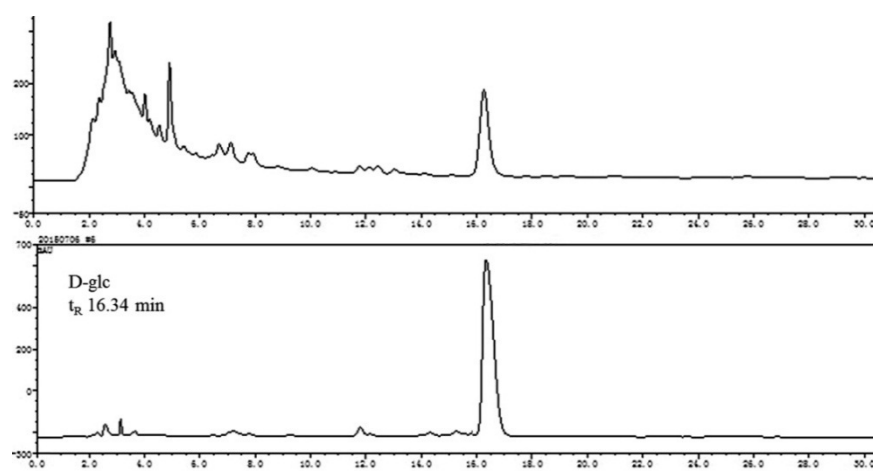

Figure S17. HPLC Analysis spectrum of sugar derivatives of **2**.

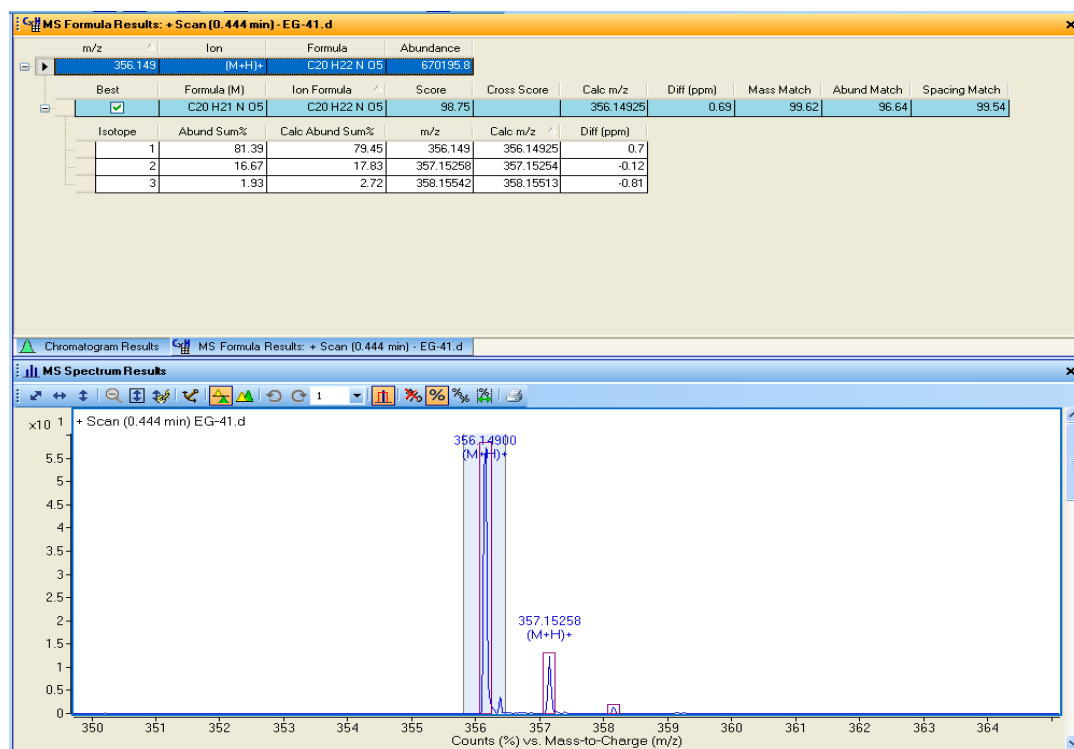

**Figure S18.** HR-ESI-MS spectrum of **3** (*N*-[(*2E*)-3-(4-hydroxyphenyl)-1-oxo-2-propen -1-yl]-l-tyrosine ethyl ester).

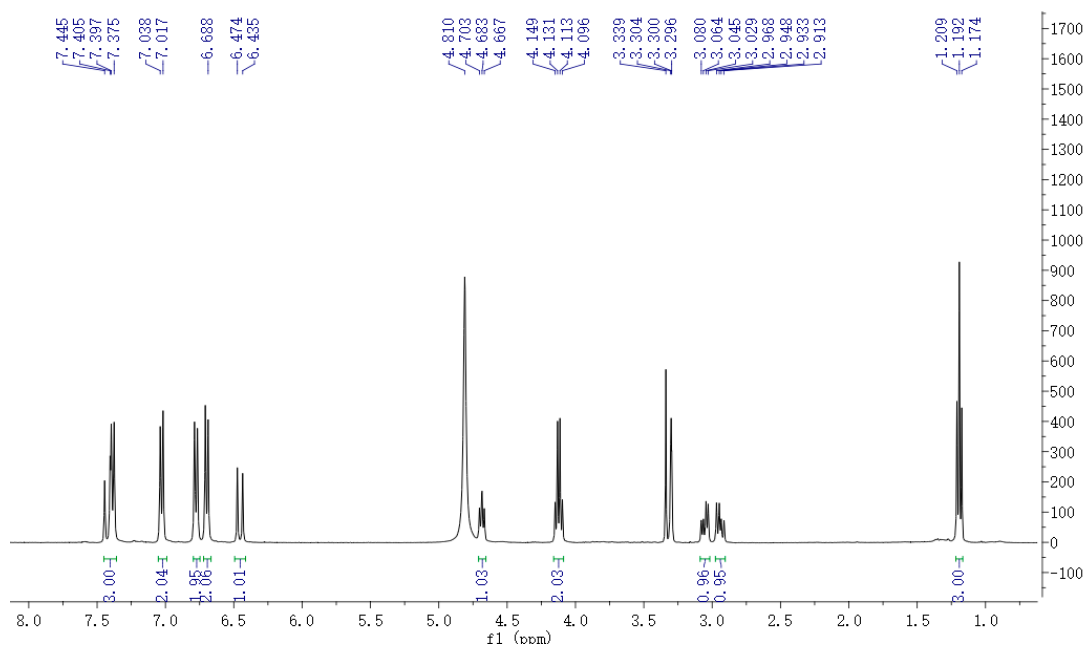

**Figure S19.** <sup>1</sup>H-NMR spectrum of **3** in CD<sub>3</sub>OD.

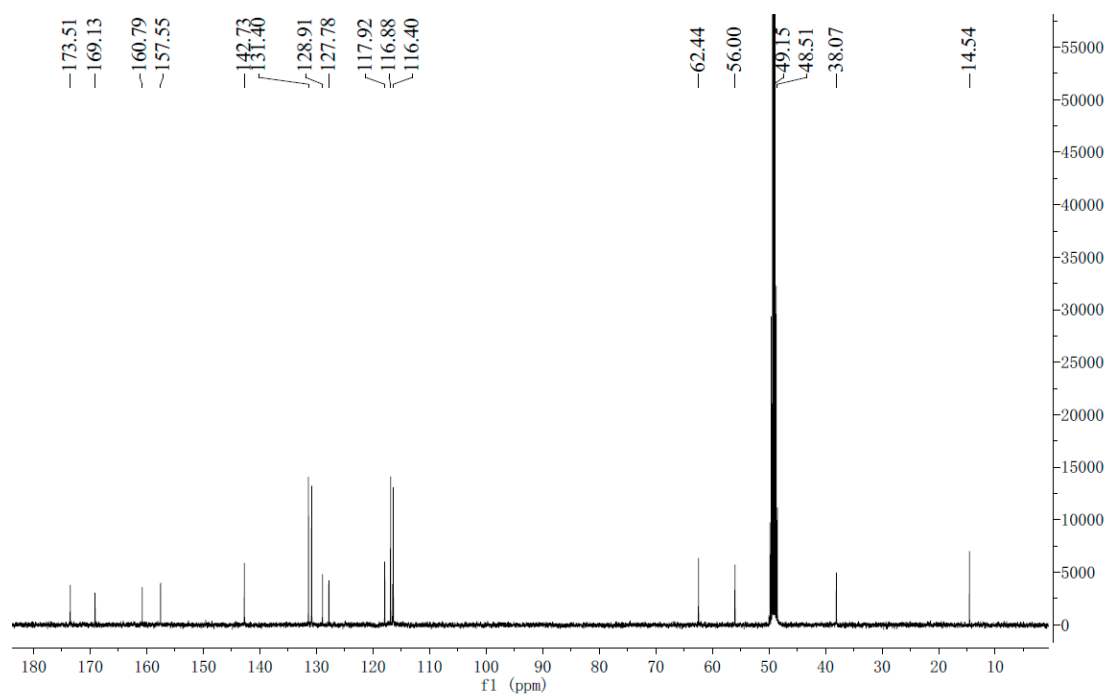

Figure S20. <sup>13</sup>C-NMR spectrum of 3 in CD<sub>3</sub>OD.

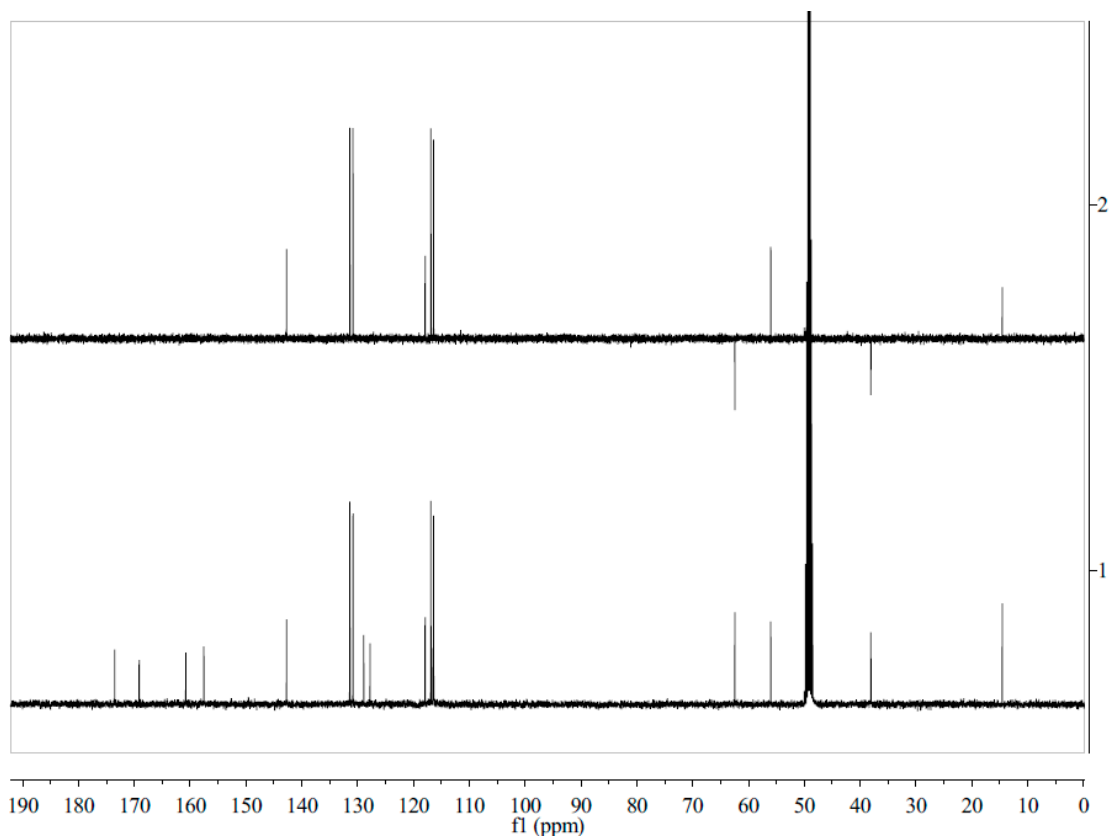

Figure S21. DEPT spectrum of 3 in CD<sub>3</sub>OD.

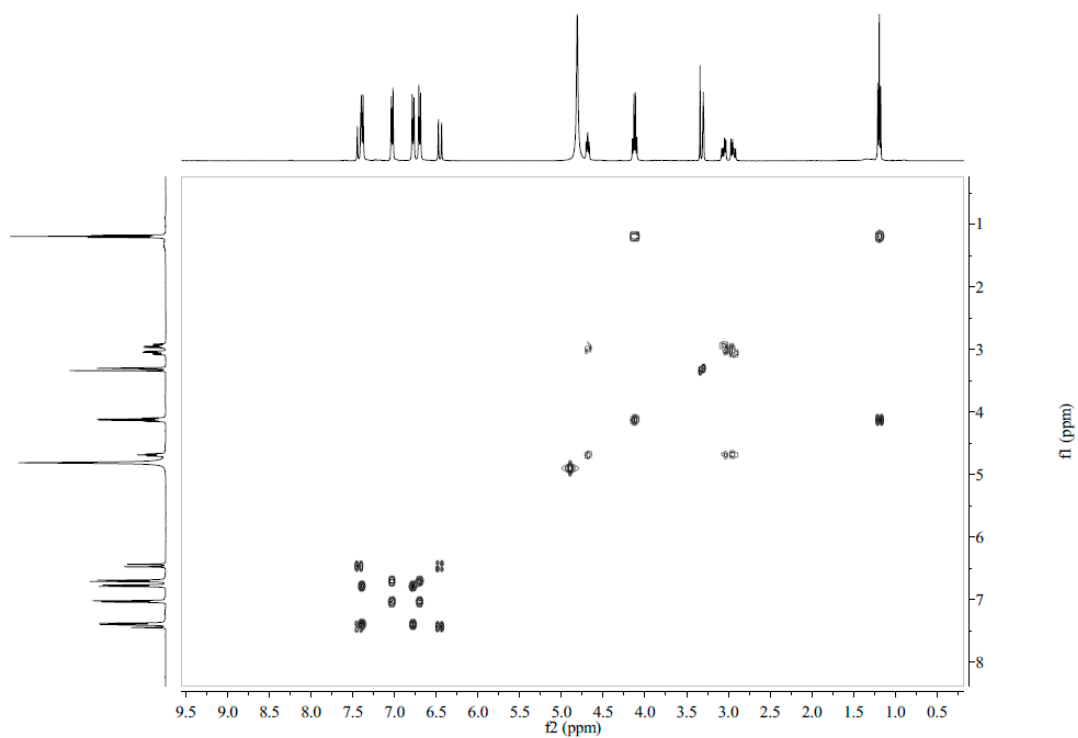

Figure S22.  $^1\text{H}$ - $^1\text{H}$  COSY spectrum of **3** in  $\text{CD}_3\text{OD}$ .

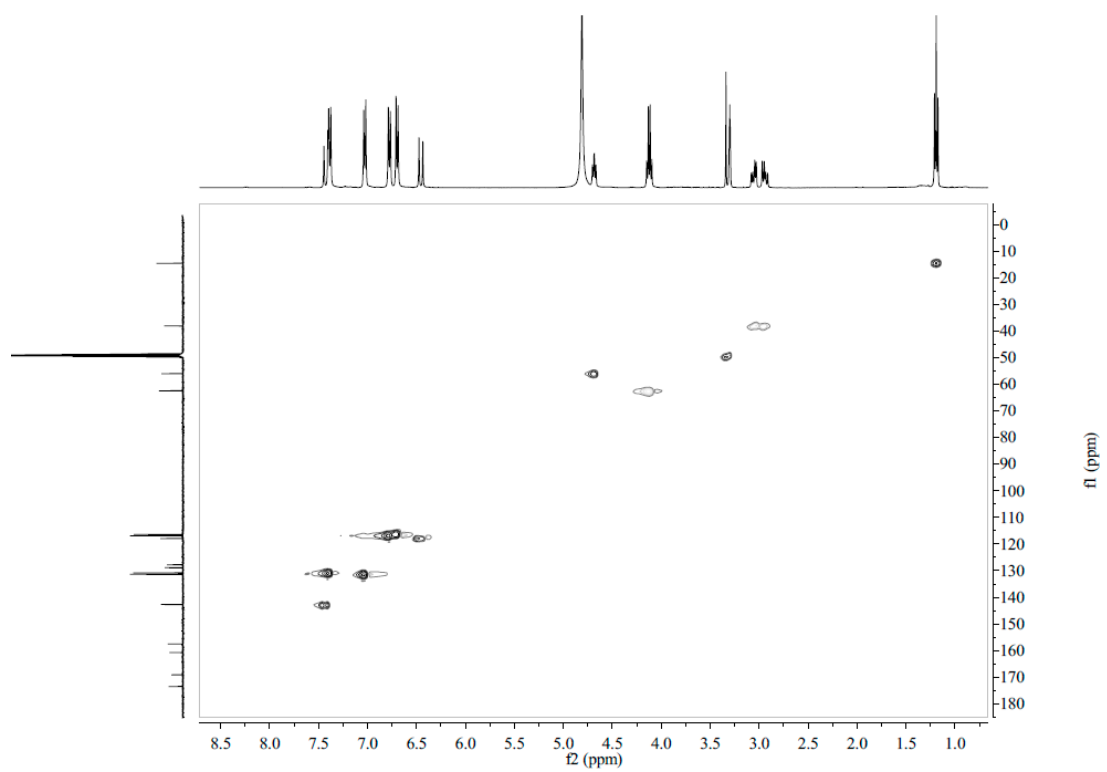

Figure S23. HSQC spectrum of **3** in  $\text{CD}_3\text{OD}$ .

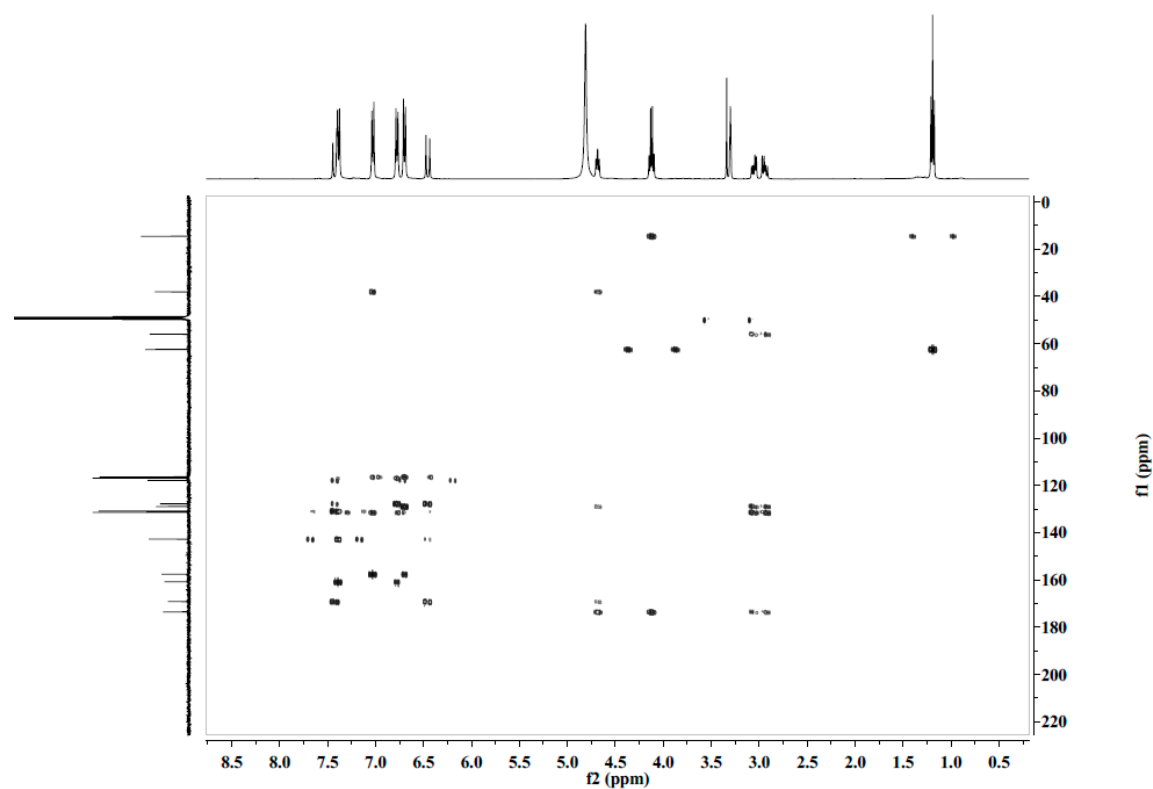

Figure S24. HMBC spectrum of **3** in CD<sub>3</sub>OD.
